# Supplementary material for: Co-expression of cancer-testis antigens of MAGE-A6 and MAGE-A11 is associated with tumor aggressiveness in patients with bladder cancer
Source: PubMed Central journal article supplement (PMC8755713; doi:10.1038/s41598-021-04510-2), 2022-01-12
Supplement: 41598_2021_4510_MOESM2_ESM.pdf [file 41598_2021_4510_MOESM2_ESM.pdf]

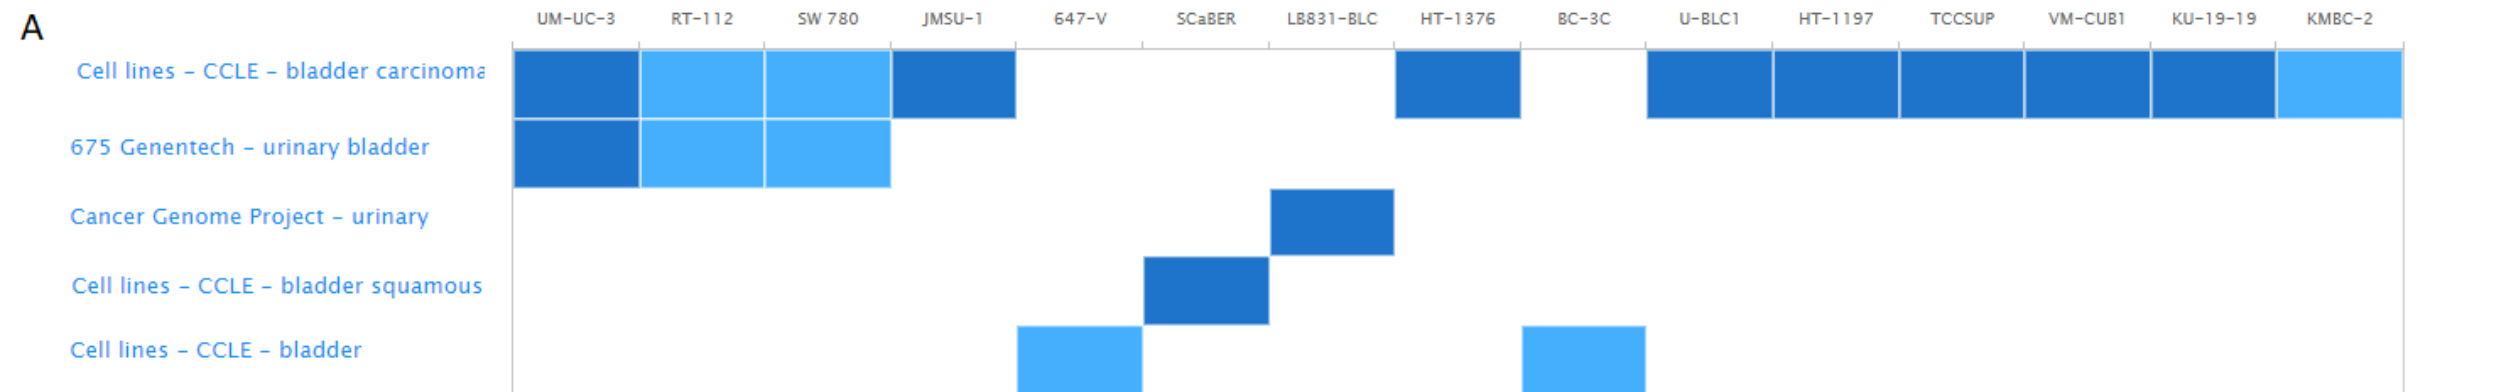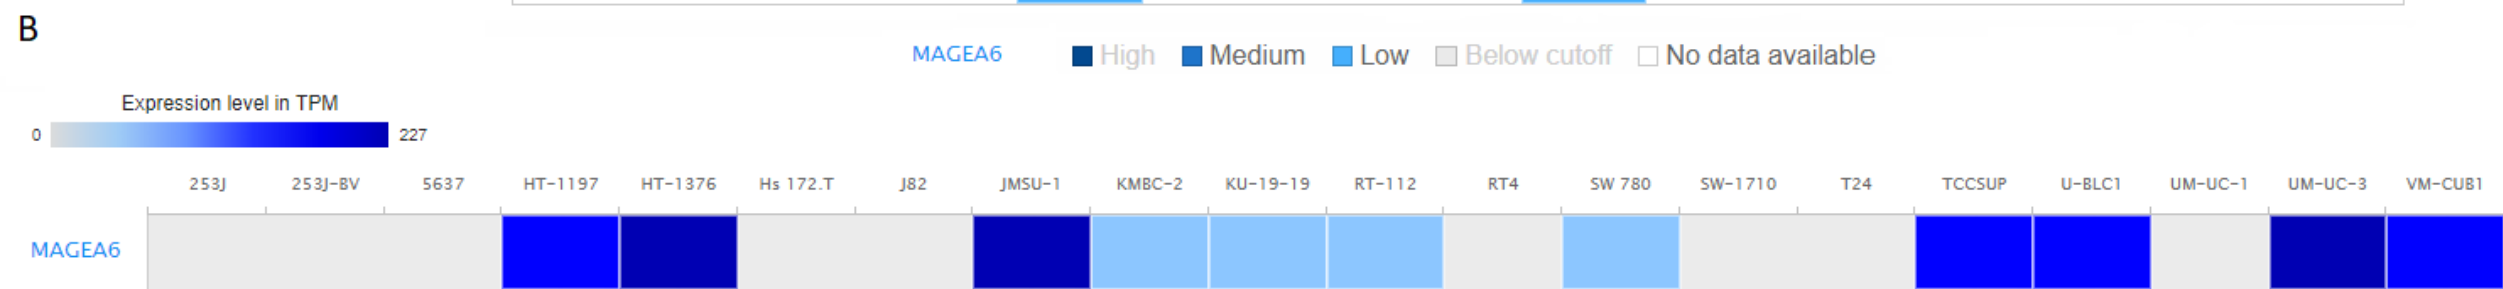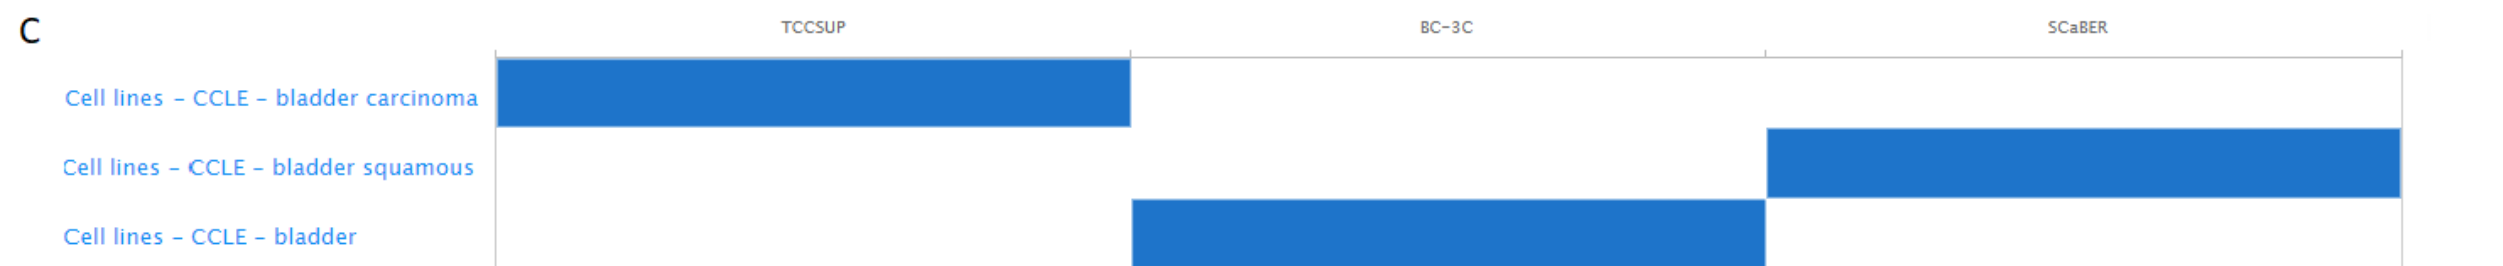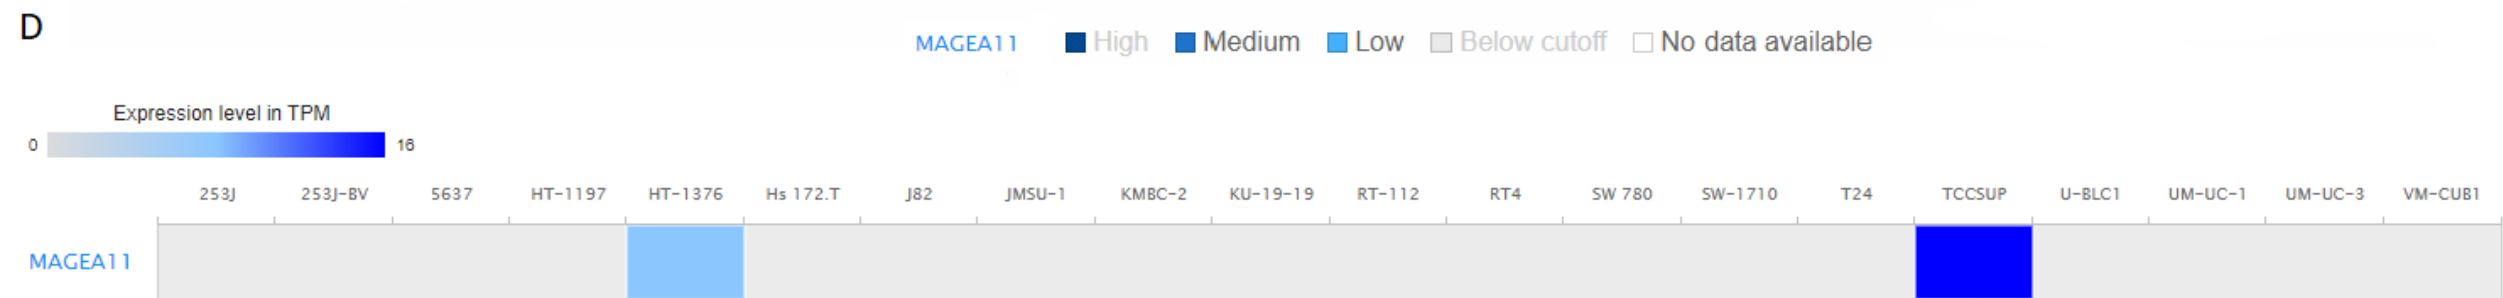

**Supplementary Figure 2:** Expression atlas (EMBL-EBI's resource) for MAGE-A6 and MAGE-A11 gene expression in bladder cancer cell lines. **(A)** the medium baseline expression of MAGE-A6 can be found in UM-UC-3, JMSU-1, SCaBER, LB831-BLC, HT-1376, U-BLC1, HT-1197, TCCSUP, VM-CUB1, and KU-19-19 bladder cancer cell lines in five different experiments, **(B)** the high baseline expression of MAGE-A6 can be declared in HT-1376, JMSU-1, and UM-UC-3 cell lines and lower expression in HT-1197, TCCSUP, U-BLC1, VM-CUB1, sequentially, **(C)** the medium baseline expression of MAGE-A11 can be identified in TCCSUP, BC-3C, and SCaBER cell lines in three different experiments, **(D)** the medium baseline expression of MAGE-A11 was shown in TCCSUP cell line.
